# Supplementary material
Source: Elsevier journal article supplement (https://cris.unibo.it/retrieve/handle/11585/1037572/50c13f66-4d2d-400e-ab9a-bf4a456ac671/mmc1.docx)
Supplement: mmc1 [file mmc1.docx]

**Chronic kidney disease classification according to different formulas and impact on adverse outcomes in patients with atrial fibrillation: a report from a prospective observational European registry**

**Supplementary Materials**

**TABLES**

**Supplementary Material.** Equation, advantages and disadvatages of different formulas considered.

| eGFR Formula | Equation | | Advantages | Disadvantages |
| --- | --- | --- | --- | --- |
| CKD-EPI2021 | eGFR = 142 * min(standardized Scr/κ,1)α x max(standardized Scr/κ, 1)-1.200 x 0.9938Age x 1.012 [if female]  κ = 0.7 (females) or 0.9 (males) α = -0.241 (females) or -0.302 (males) min = indicates the minimum of Scr/κ or 1 max = indicates the maximum of Scr/κ or 1 | | Most accurate equation in different CKD stages and reference equation for GFR estimation  Large validation set  Validated with different BMI  Ending disparities (not considering race) | Underestimates measured GFR in Blacks and overestimates measured GFR in non-Blacks, resulting in differences in CKD-staging in both groups  Smaller number of Black participants than non-Black participants in the validation set, so the estimates of accuracy may be less precise in Black persons  Insufficient representation of racial and ethnic groups other than Black and White in validation set  Less accurate in older people  Less accurate than equation including both cystatin and creatinine  Performs worse than the CKD-EPI 2009 in white Europeans |
| Cockcroft-Gault (CG) (1973) | eGFR ={((140–age) x weight)/(72xSCr)}x 0.85 (if female) | | Reference equation for DOAC dosing | Estimates creatinine clearance, not GFR  Less accurate than modern equations  Small validation set  Less precise in women, extreme BMI (high or low)  Doesn’t account for height |
| CG-BSA | eGFR= (1.73 m2 × GFR-CG)/BSA | | Accounts for BSA | Same as CG |
| Berlin Initiative study-1 (bis-1) (2010) | eGFR= 3736 x SCr - 0.87 x Age - 0.95 x (0.82 if female) | | More accurate than CDK-EPI for older people  Better than the CKD-EPI formula for risk stratification of CKD in elderly people with CV disease | Not validated for young patients |
| full age spectrum (FAS) (2016) | 2 ≤ age < 40 years: eGFR = 107.3/(SCr/Q)  Age > 40 years: eGFR = 107.3/(SCr/Q) × 0.988(Age−40)  males: Q= 62 μmol/L (0.70 mg/dL), females: Q= 80 μmol/L (0.90 mg/dL) | | Improved validity and continuity across the full age-spectrum  Overcomes the needing of different equations in different age-subgroups  Less biased and more accurate than CKD-EPI for older adults. | Does not improve imprecision of other equations  Validated for Caucasian only |
| Lund–Malmö revised  (lmr) (2014) | eGFR = e X – 0.0158 age x 0.438 x ln(age) | | Superior than CDK-EPI in Swedish population | Not validated for other populations |
| Female  pCr < 150 mmol/L: X = 2.50 + 0.0121 x (150-pCr)  pC r≥ 150  mmol/L: X = 2.50 - 0.926 x ln(pCr/150) | Male  pCr < 180  mmol/L: X=2.56 + 0.00968 x (180-pCr)  pCr ≥ 180  mmol/L: X= 2.56- 0.926 x ln(pCr/180) |
| Modification of diet in renal disease (MDRD) (1992) | eGFR = 175 x (PCr)−1.154x age−0.203 x [0.742 if female] x [1.212 if black] | | Similar accucary than CDK-EPI | Does not account for BSA |
| European Kidney Function Consortium (EKFC) (2023) | Age 18-40   - SCr < Q: eGFR=107.3 ×(SCr/Q)−0.322 - SCr ≥ Q:  eGFR= 107.3 × (SCr/Q)−1.132 | Age > 40   - SCr < Q:   eGFR = 107.3 × (SCr/Q)−0.322 × 0.990(Age−40)   - SCr > Q:   eGFR = 107.3 × (SCr/Q)−1.132 × 0.990(Age−40) | Provides a continuity of eGFR at the transition between pediatric and adult care, and performs reasonably well in diverse populations. Overcomes the needing of different equations in different age-subgroups  Q integrates non-GFR determinants of creatinine | Needs more external validation |
| Males: ln(Q) = 3.200 + 0.259 × Age−0.543 × ln(Age)−0.00763 × Age2 + 0.0000790 × Age3 (18–25 years); Q= 80 μmol/L (0.90 mg/dL) (>25 years);  Females: ln(Q) = 3.080 + 0.177 × Age−0.223 × ln(Age)−0.00596 × Age2 + 0.0000686 × Age3 (18–25 years); Q= 62 μmol/L (0.70 mg/dL) (>25 years). | |

**Supplementary Table 1.** Crude rate of events according to different stages of CKD

|  | Stage I | Stage II | Stage IIIa | Stage IIIb | Stage IV/V | P value |
| --- | --- | --- | --- | --- | --- | --- |
| n | 1304 | 4263 | 1723 | 904 | 322 |  |
| **Composite outcome, N (%)** | 123 (10.5) | 519 (13.6) | 305 (19.7) | 221 (27.9) | 127 (43.5) | <0.001 |
| **All-cause Death, N (%)** | 64 (5.2) | 288 (7.1) | 195 (12.0) | 164 (19.6) | 111 (36.8) | <0.001 |

**Supplementary Table 2.** De-Long test for comparison between ROC of different formulas

| **CKD-EPI** | **0.001** | **<0.001** | **<0.001** | **<0.001** | **<0.001** | **<0.001** | **<0.001** |
| --- | --- | --- | --- | --- | --- | --- | --- |
| **CG** | **0.015** | **<0.001** | **<0.001** | **<0.001** | **0.044** | 0.786 |  |
| **CG-BSA** | **<0.001** | **<0.001** | **<0.001** | **<0.001** | **<0.001** |  |  |
| **BIS1** | 0.110 | **<0.001** | **<0.001** | **<0.001** |  |  |  |
| **FAS** | 0.967 | **<0.001** | 0.398 |  |  |  |  |
| **LMR** | 0.801 | **<0.001** |  |  |  |  |  |
| **MDRD** | **<0.001** |  |  |  |  |  |  |
|  | **EKFC** | **MDRD** | **LMR** | **FAS** | **BIS1** | **CG-BSA** | **CG** |

**Legend.** BIS1 Berlin Initiative Study; CG, Cockcroft Gault; CG-BSA, Cockcroft Gault adjusted for body surface area; CKD-EPI, Chronic Kidney Disease Epidemiology Collaboration; EKFC, European Kidney Function Consortium ; FAS, Full Age Spectrum; LMR, Liquidity Maintenance Ratio; MDRD, Modification of Diet in Renal Disease.

**FIGURES**

**Supplementary Figure 1.** Kaplan-Meier curves for all-cause death according to CKD stages.


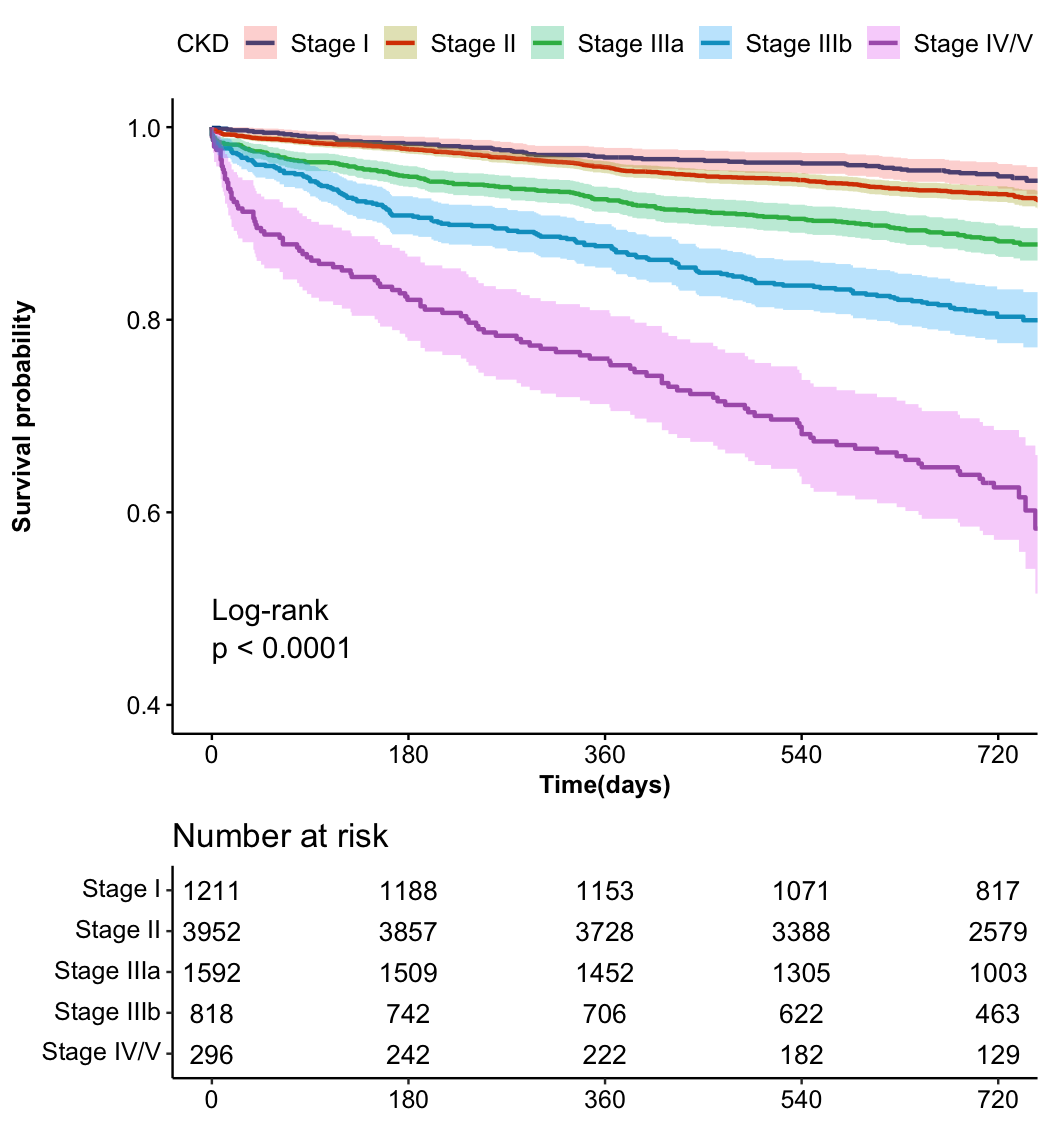


**Supplementary Figure 2.** Cox regression analysis for association between stages of CKD and the primary composite outcome. Results are expressed as Hazard ratio and 95% confidence interval.


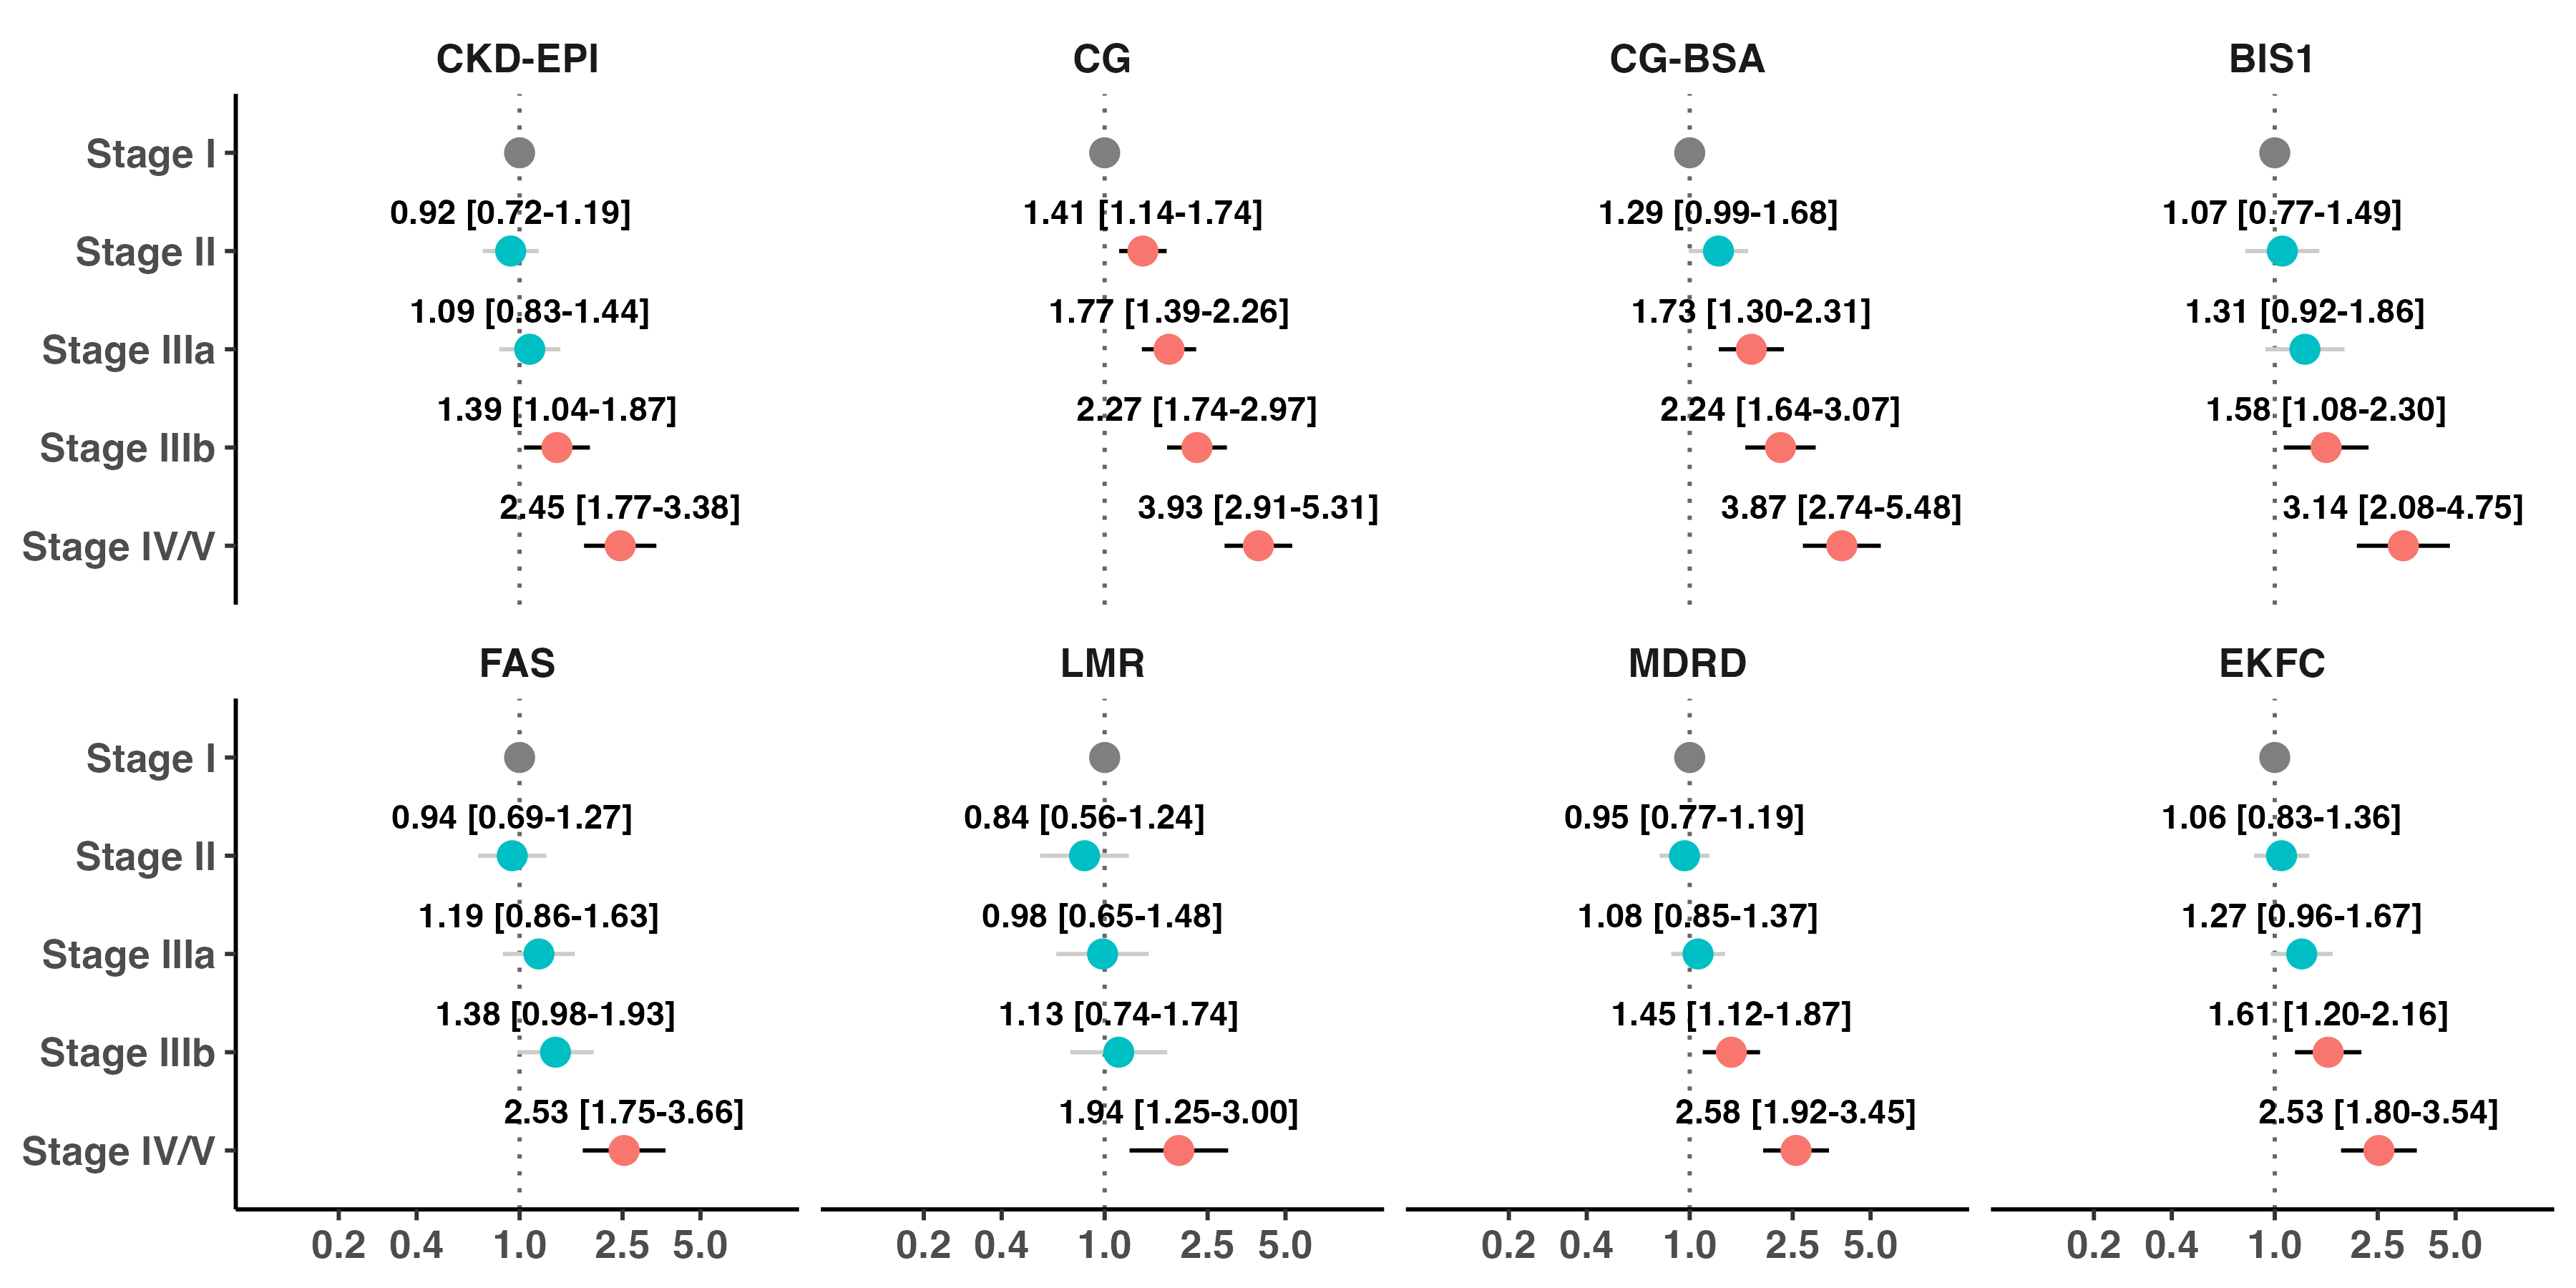


**Legend.** BIS1 Berlin Initiative Study; CG, Cockcroft Gault; CG-BSA, Cockcroft Gault adjusted for body surface area; CKD-EPI, Chronic Kidney Disease Epidemiology Collaboration; EKFC, European Kidney Function Consortium ; FAS, Full Age Spectrum; LMR, Liquidity Maintenance Ratio; MDRD, Modification of Diet in Renal Disease.

**Supplementary Figure 3.** Cox regression analysis for association between stages of CKD and All-cause death. Results are expressed as Hazard ratio and 95% confidence interval.


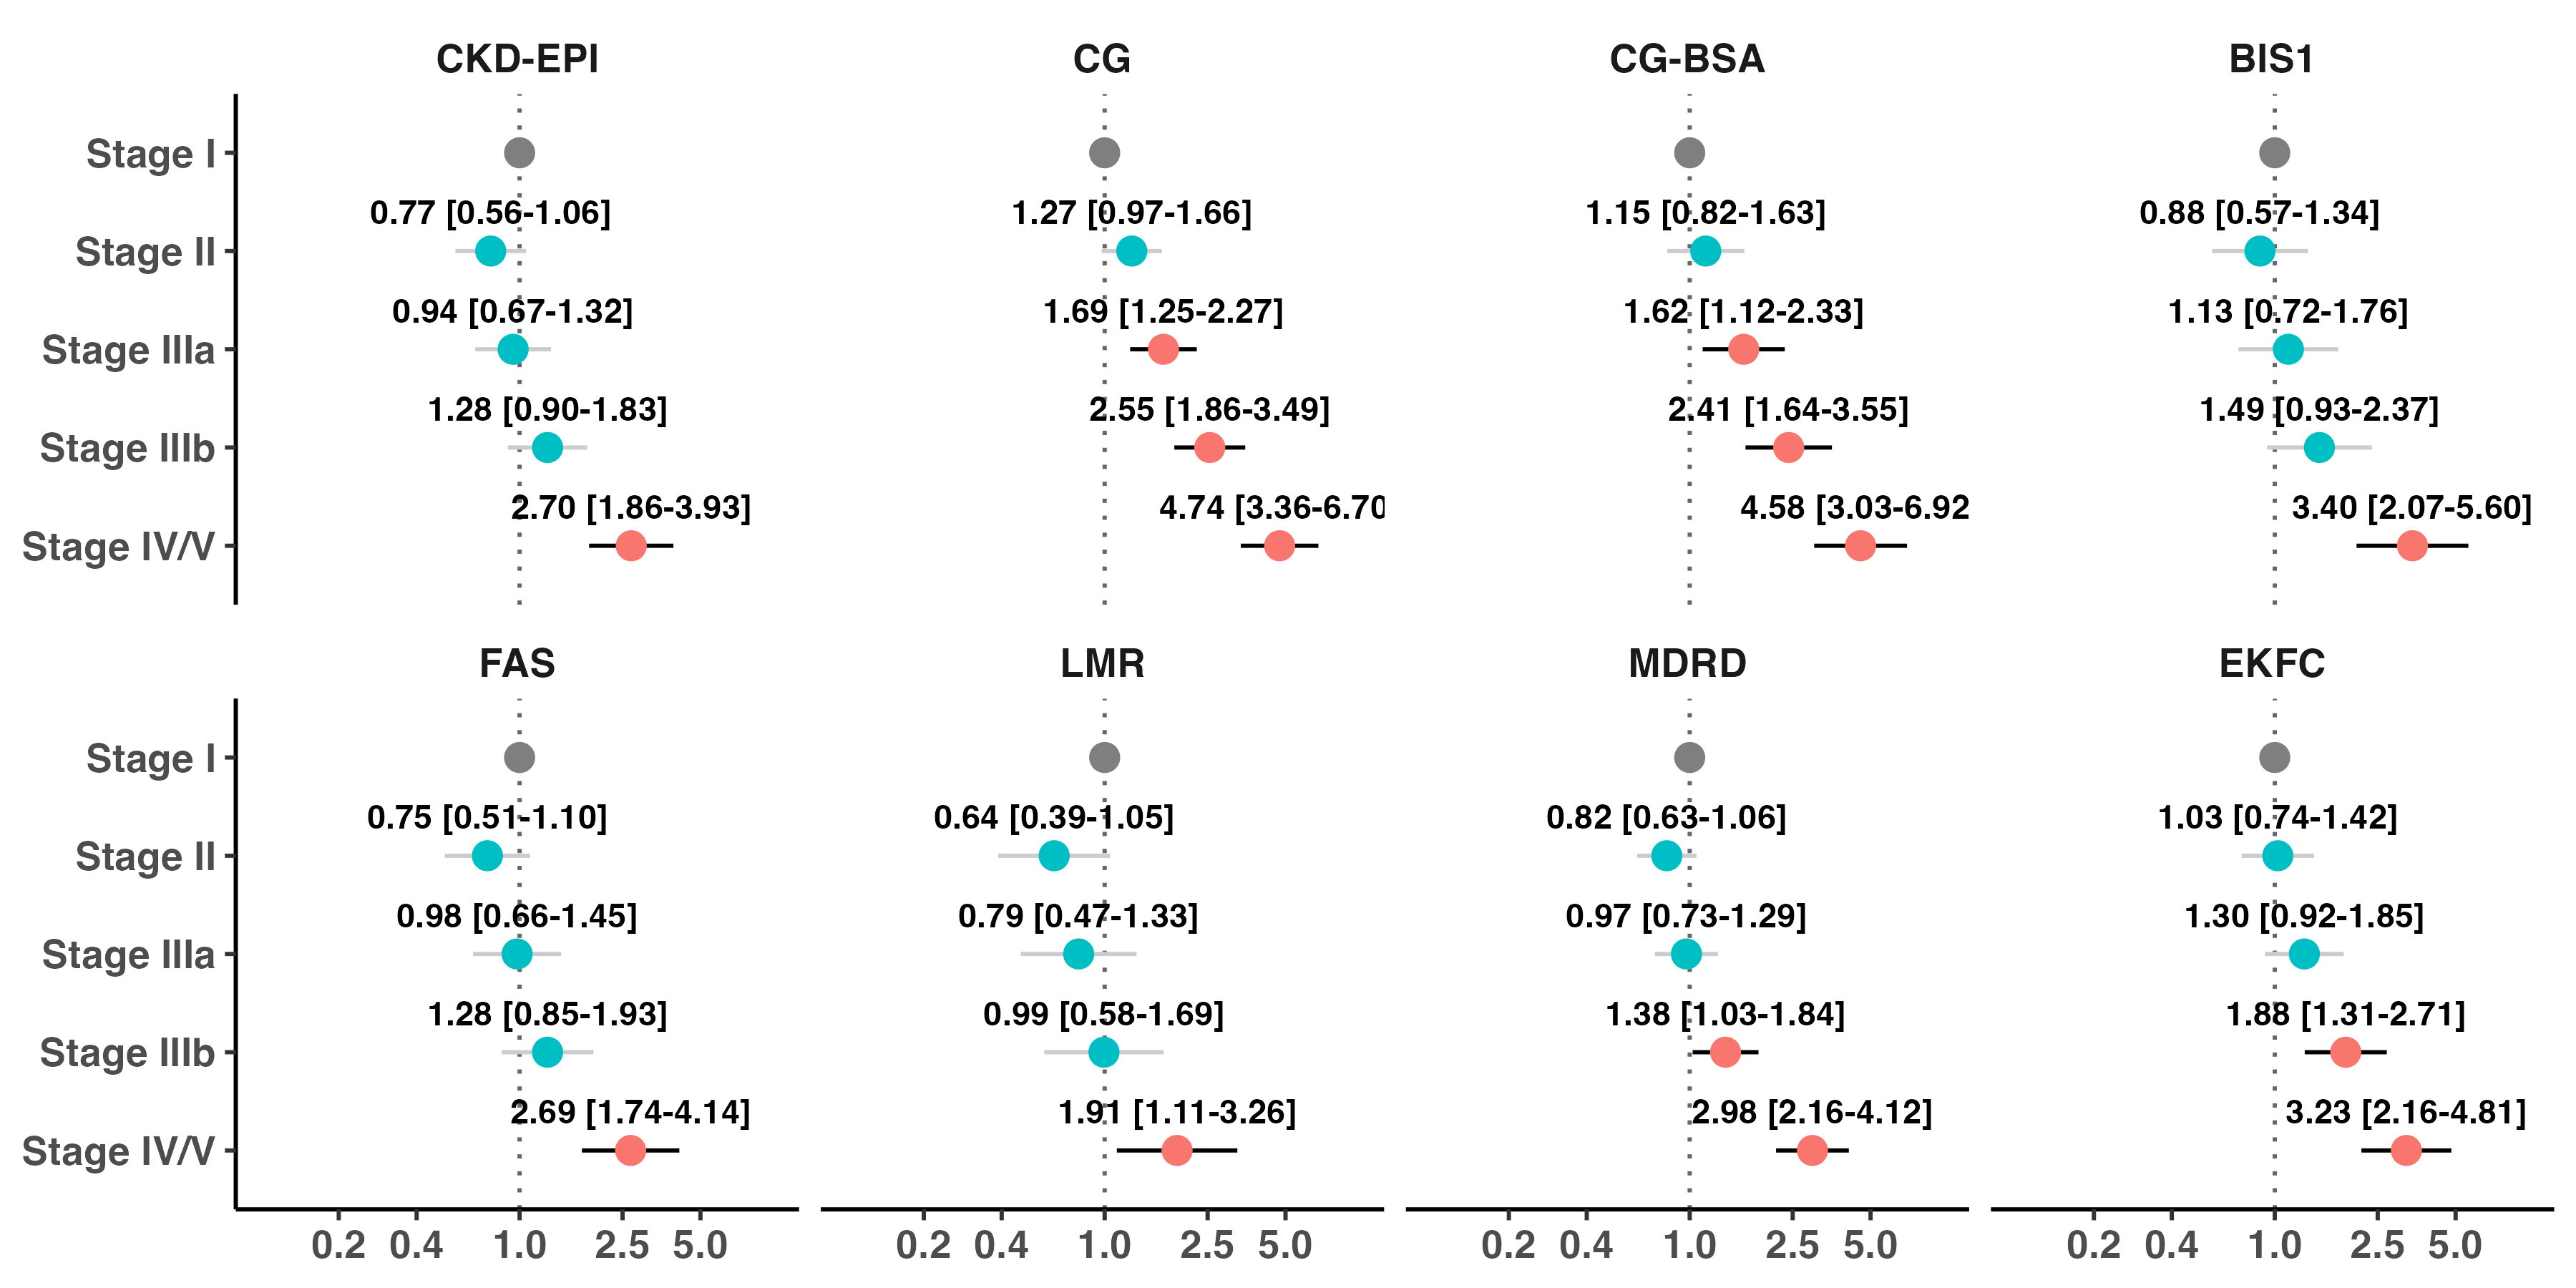


**Legend.** BIS1 Berlin Initiative Study; CG, Cockcroft Gault; CG-BSA, Cockcroft Gault adjusted for body surface area; CKD-EPI, Chronic Kidney Disease Epidemiology Collaboration; EKFC, European Kidney Function Consortium ; FAS, Full Age Spectrum; LMR, Liquidity Maintenance Ratio; MDRD, Modification of Diet in Renal Disease.

**Supplementary Figure 4.** Spline curves expressing the non-linear association between eGFR (or CrCl) and all-cause death.


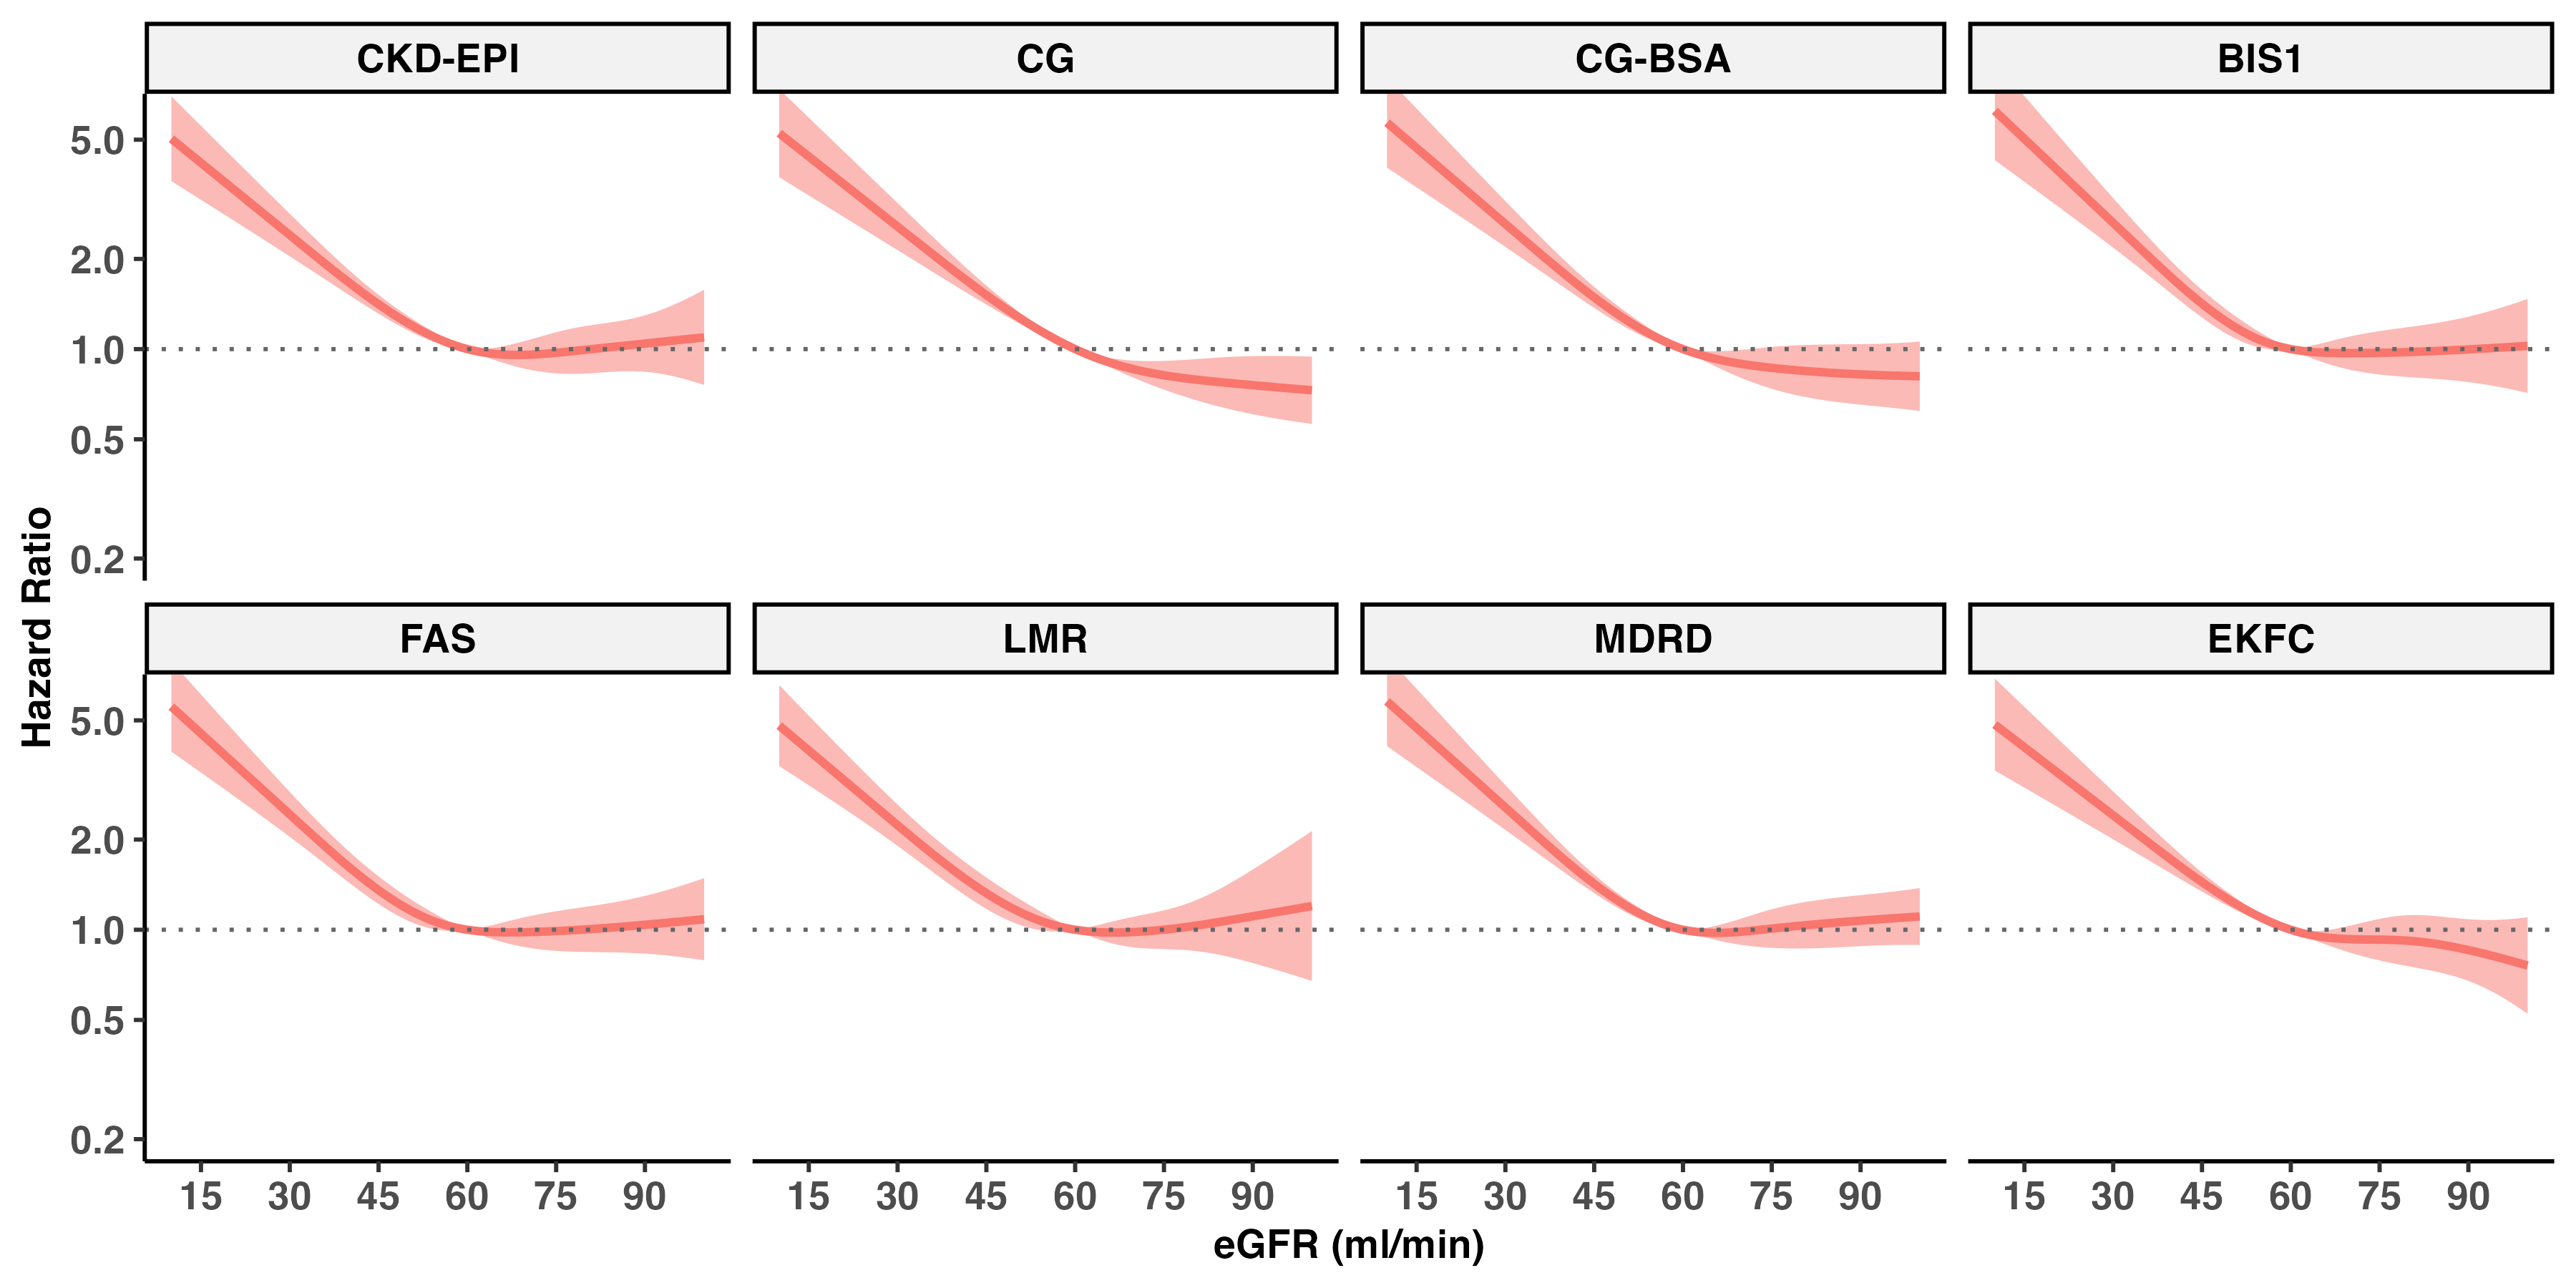


**Legend.** BIS1 Berlin Initiative Study; CG, Cockcroft Gault; CG-BSA, Cockcroft Gault adjusted for body surface area; CKD-EPI, Chronic Kidney Disease Epidemiology Collaboration; EKFC, European Kidney Function Consortium ; FAS, Full Age Spectrum; LMR, Liquidity Maintenance Ratio; MDRD, Modification of Diet in Renal Disease.

**Supplementary Figure 5.** Area under the curve for prediction of thromboembolic events for different equations.


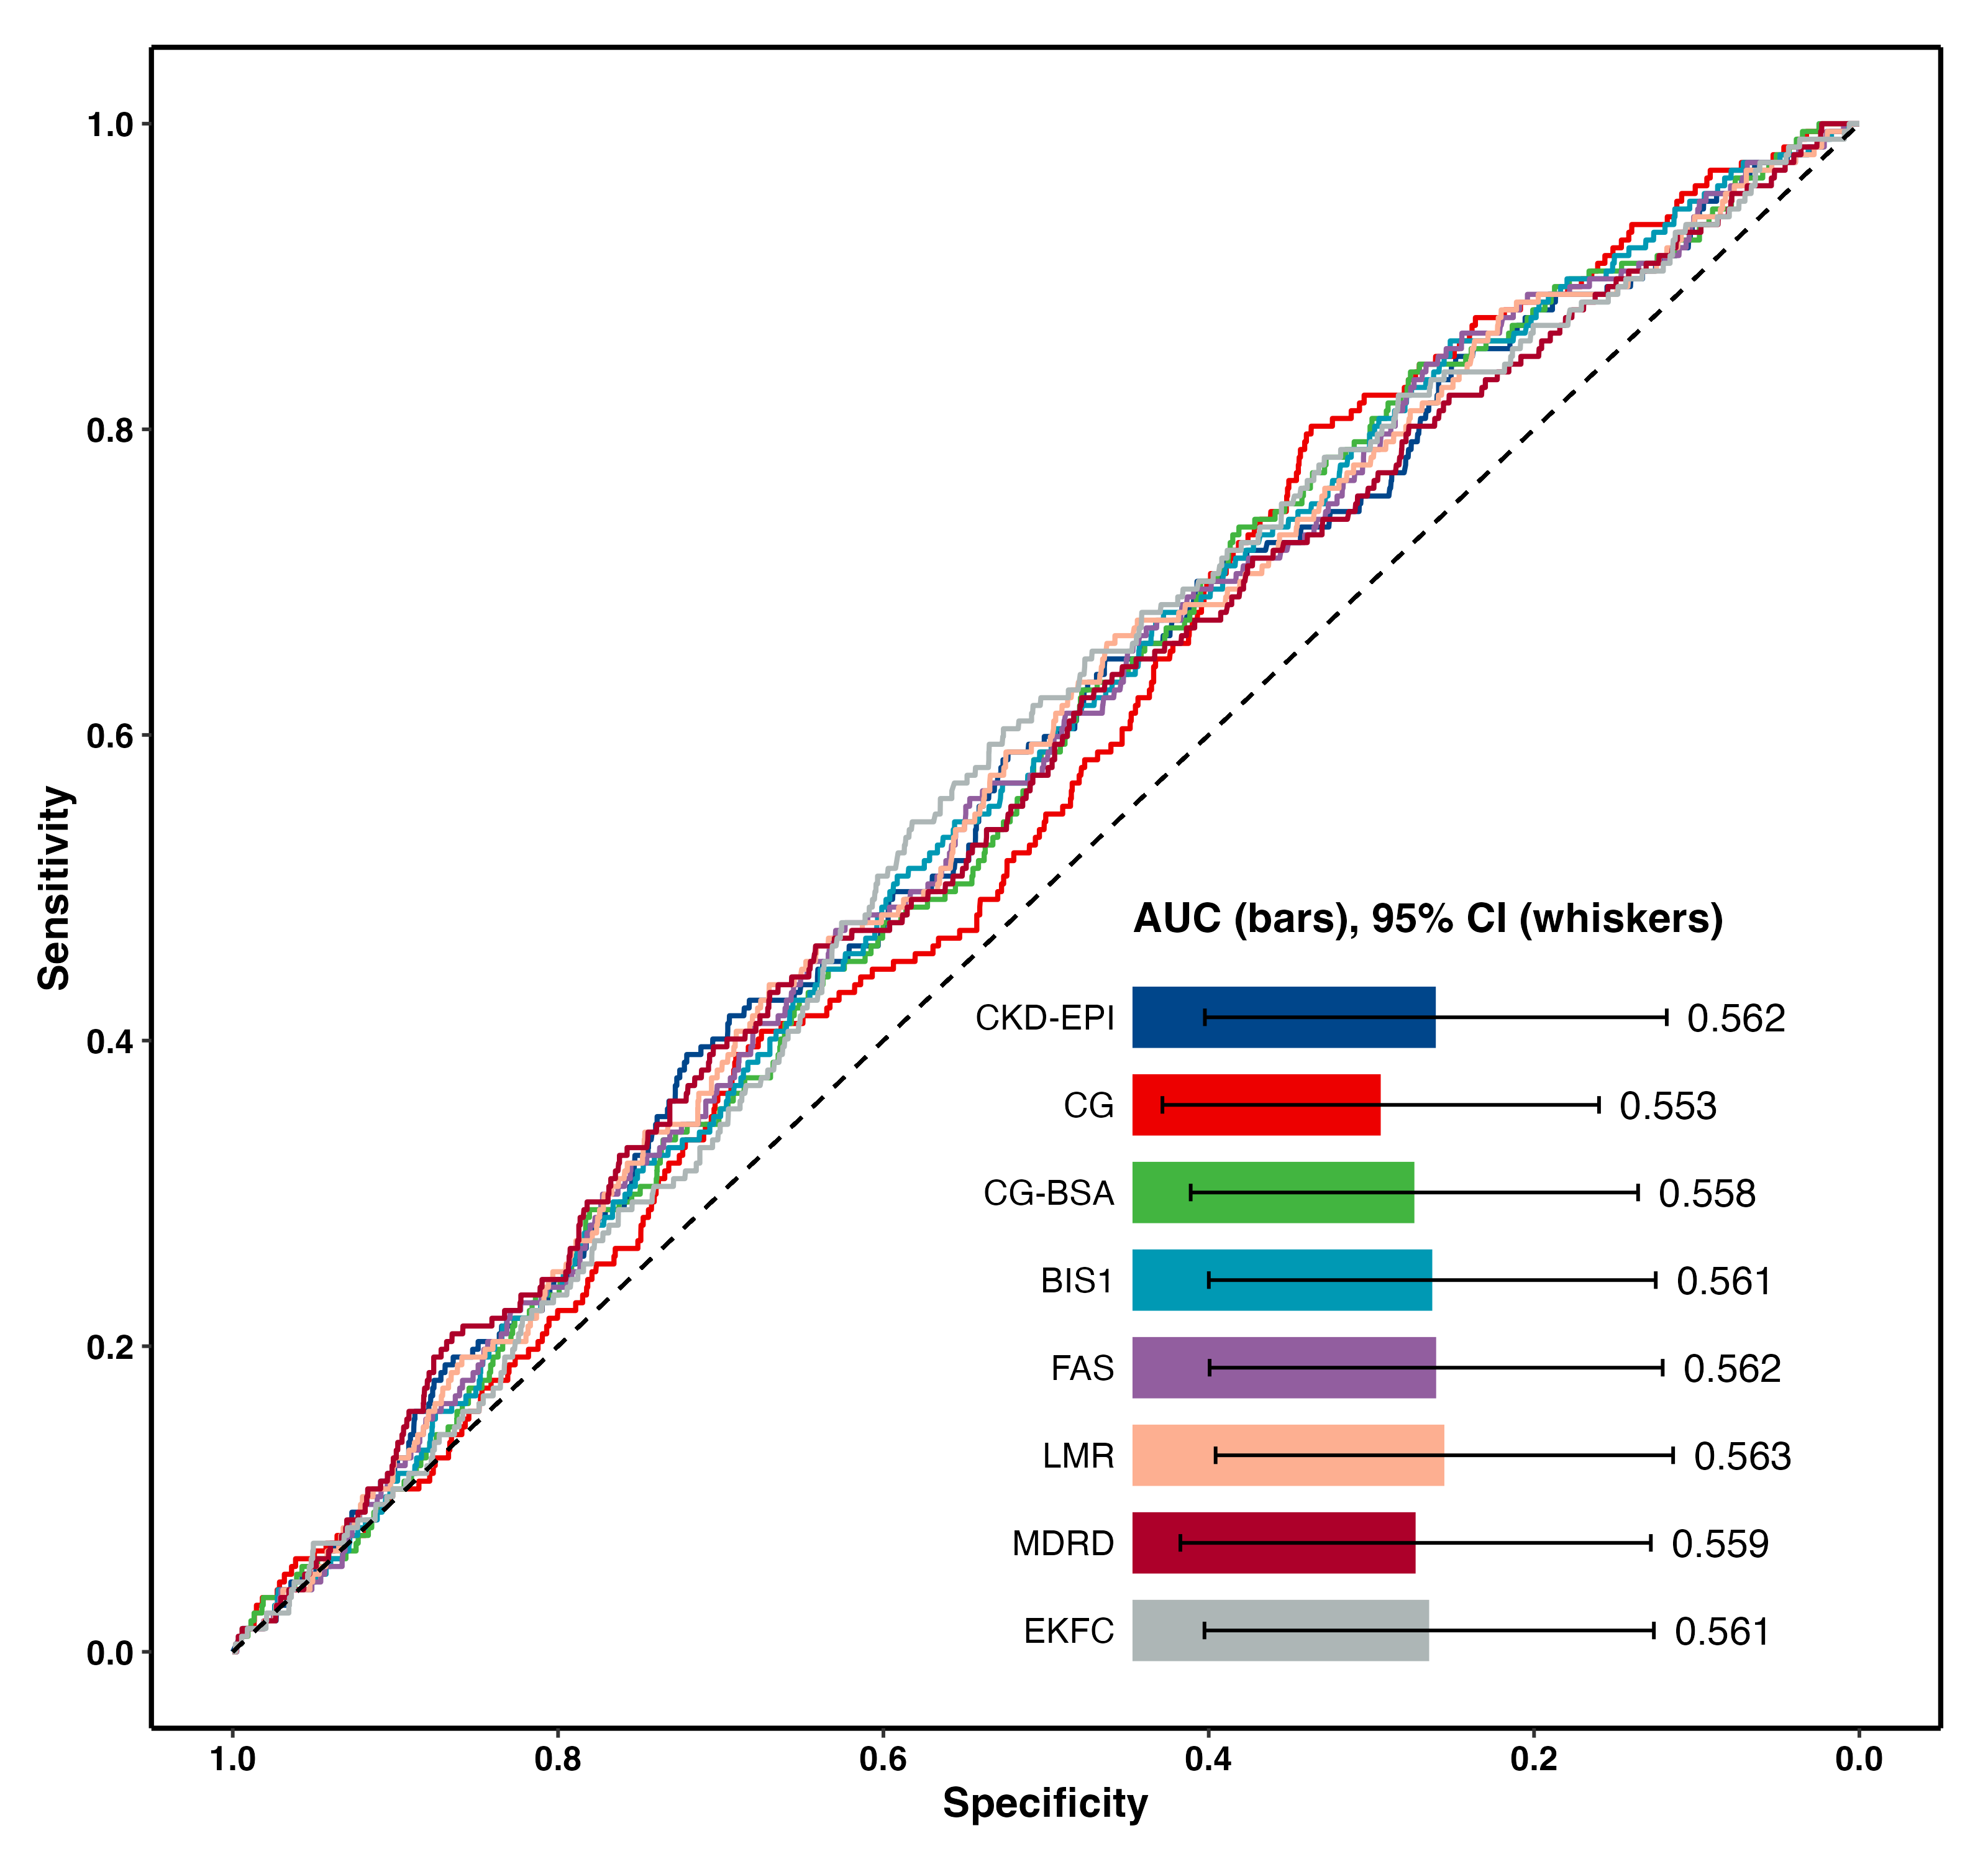


**Legend.** AUC, area under the curve; BIS1 Berlin Initiative Study; CI, confidence interval; CG, Cockcroft Gault; CG-BSA, Cockcroft Gault adjusted for body surface area; CKD-EPI, Chronic Kidney Disease Epidemiology Collaboration; EKFC, European Kidney Function Consortium ; FAS, Full Age Spectrum; LMR, Liquidity Maintenance Ratio; MDRD, Modification of Diet in Renal Disease.
